# Supplementary material for: Mismatch-Repair Protein Expression in High-Grade Gliomas: A Large Retrospective Multicenter Study
Source: PubMed Central journal article supplement (PMC7555820; doi:10.3390/ijms21186716), 2020-09-14

**Supplementary Figure 1.** Association between immunohistochemical PARTIAL LOSS of MMR protein expression and clinical / molecular characteristics

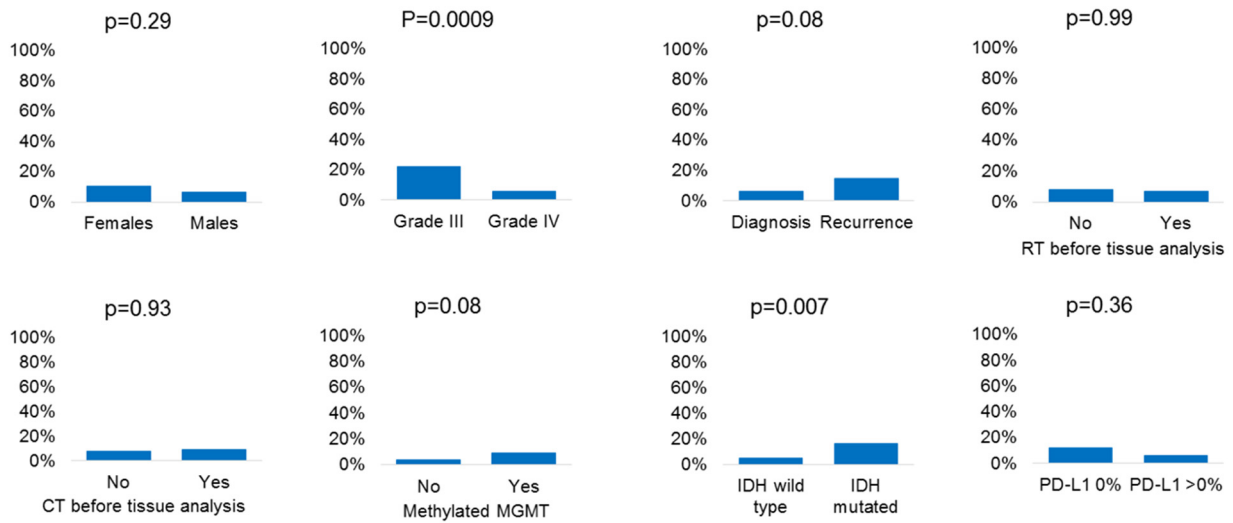

**Supplementary Figure 2.** Association between immunohistochemical COMPLETE LOSS of MMR protein expression and clinical / molecular characteristics

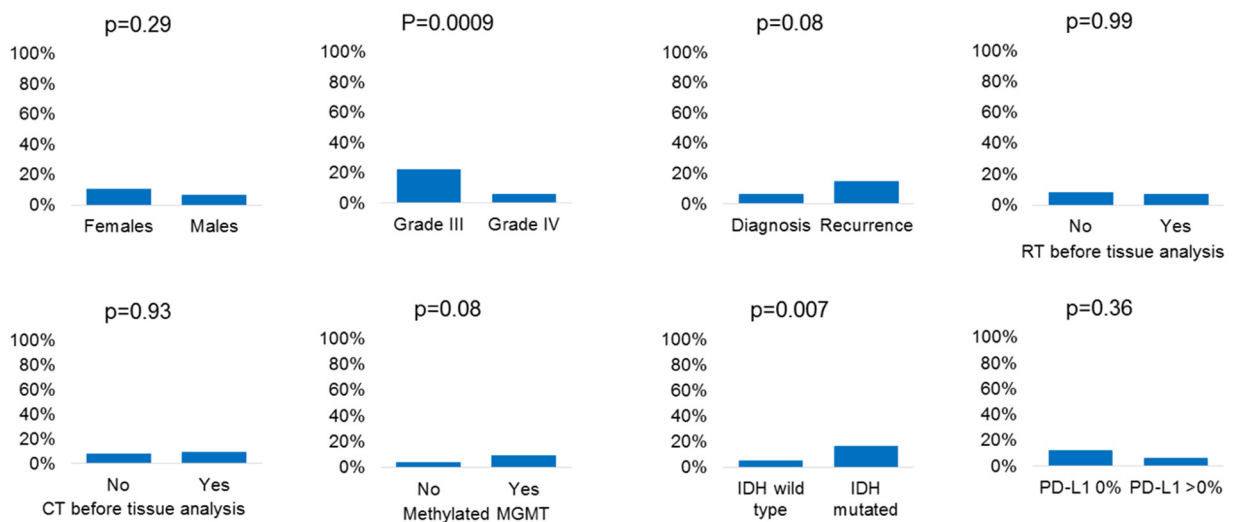

Supplement: ijms-21-06716-s001.pdf [file ijms-21-06716-s001.pdf]
